# Supplementary material for: Genomic Study of Intestinal Microbiota: Assessing the Impact of Probiotics and Healthy Lifestyle on Weight Loss in Adults with Obesity
Source: Preprints.org preprint supplement (doi:10.20944/preprints202402.0848.v1), 2024-02-15
Supplement: Supplementary file 1 [file Cover letter.docx]

Dear Editor,

I would like to submit our groundbreaking study titled "Genomic Study of Intestinal Microbiota: Assessing the Impact of Probiotics and Healthy Lifestyle on Weight Loss in Adults with Obesity" for your consideration. In this scientific article, we address the growing importance of the intestinal microbiota in health and disease development, such as obesity. The global prevalence of obesity has been alarmingly increasing, becoming a significant challenge for public health. While the use of probiotics has been proposed as a therapeutic intervention for weight management, their isolated impact on weight loss has been limited.

Based on this knowledge gap, we hypothesized that probiotics, when combined with healthy lifestyle habits, could potentiate their effects on weight loss. We believe that this combined approach may trigger beneficial changes in the composition of the intestinal microbiota, leading to more significant results.

To test our hypothesis, we conducted a randomized clinical trial with a group of obese patients. These participants underwent a treatment regimen that involved the administration of specific probiotics, along with the adoption of healthy lifestyle habits such as improved dietary habits, regular physical activity, enhanced sleep quality, and anxiety management. We collected fecal samples from these patients before and after the treatment period and conducted detailed analyses of the intestinal microbiota composition.

Our results are promising and suggest that the combination of probiotics with healthy lifestyle habits induced significant changes in the intestinal microbiota of obese patients, resulting in more pronounced weight loss compared to the isolated use of probiotics. Additionally, we observed improvements in metabolic markers associated with obesity, such as blood glucose levels and lipid profile.

We believe that the findings of this study have important implications for the field of health and can provide valuable insights into effective strategies for obesity management. Therefore, we would like to submit this article for consideration in your esteemed scientific journal.

We appreciate your attention to our research in advance and sincerely hope that this work will be considered for publication. We are open to any suggestions or comments that can enhance our article.

Sincerely,

The Authors
