# Supplementary material for: Genomic Study of Intestinal Microbiota: Assessing the Impact of Probiotics and Healthy Lifestyle on Weight Loss in Adults with Obesity
Source: Preprints.org preprint supplement (doi:10.20944/preprints202402.0848.v1), 2024-02-15
Supplement: Supplementary file 2 [file Data Availability Statement.docx]

The data that support the findings will be available in [https://repositorio.ufu.br/handle/123456789/39223] at [DOI: [10.14393/ufu.di.2023.521](https://doi.org/10.14393/ufu.di.2023.521)] following an embargo from the date of publication to allow for commercialization of research findings.

All data regarding the metagenomic and proteomic analyses conducted by a private company are not available due to patient data protection measures.
