# Supplementary material for: Genomic Study of Intestinal Microbiota: Assessing the Impact of Probiotics and Healthy Lifestyle on Weight Loss in Adults with Obesity
Source: Preprints.org preprint supplement (doi:10.20944/preprints202402.0848.v1), 2024-02-15
Supplement: Supplementary file 3 [file Figures.docx]

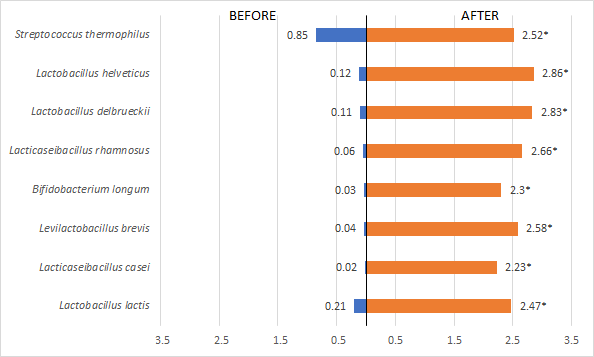


Figure 1. Analysis of the presence of bacterial species of probiotic before and after treatment of the patients included in the study

*p<0.05 = significant difference by Wilcoxon Test


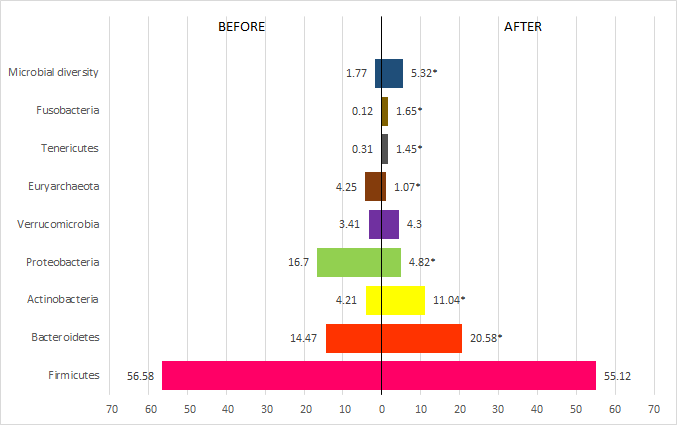


Figure 2. Analysis of phylum-related rates before and after treatment

*p<0.05 = statistically significant difference by Wilcoxon Test


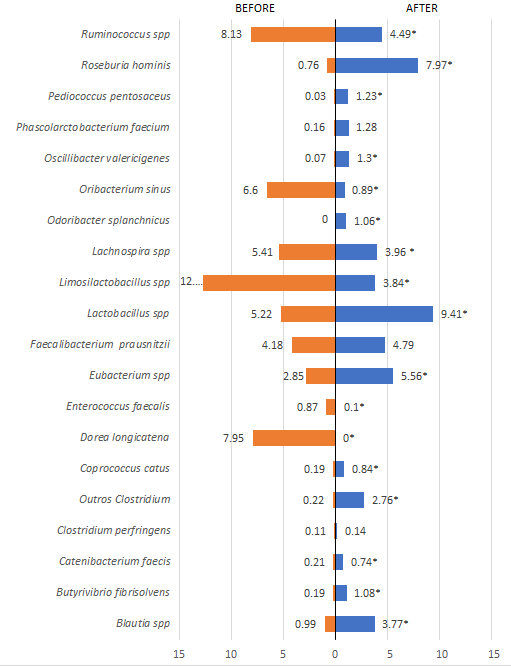


Figure 3. Bacterial species present in the phylum Firmicutes detected before and after treatment

*p<0.05 = statistically significant difference by the Wilcoxon Test


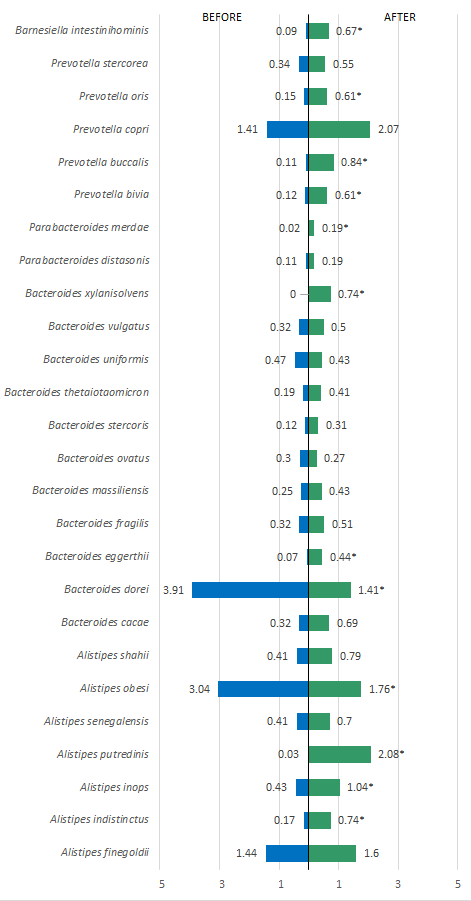


Figure 4. Bacterial species present in the phylum Bacteroidetes detected before and after treatment

*p≤ 0.05 = statistically significant difference by the Wilcoxon test


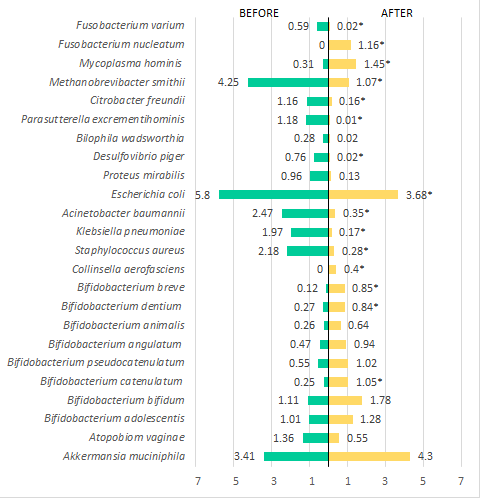


Figure 5. Bacterial species present in the phyla Verrucomicrobia, Actinobacteria, Proteobacteria, Euryarchaeota, Tenericutes, and Fusobacteria detected before and after treatment

**p<0.05 = statistically significant difference by the Wilcoxon test


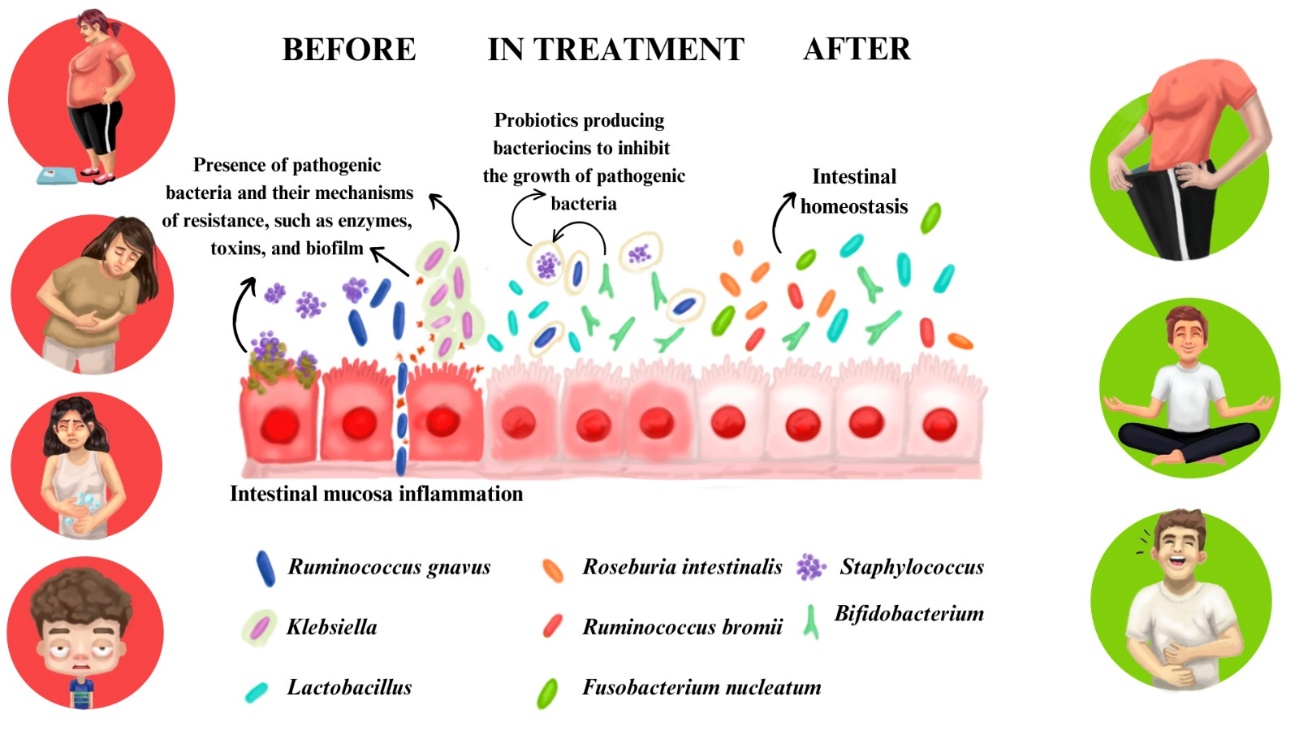


**Figure 6.** Schematic Representation of the Evolution of Intestinal Microbiota During Combined Probiotics and Healthy Lifestyle Treatment. A representation of a treatment with probiotics.
