# Supplementary material for: Genomic Study of Intestinal Microbiota: Assessing the Impact of Probiotics and Healthy Lifestyle on Weight Loss in Adults with Obesity
Source: Preprints.org preprint supplement (doi:10.20944/preprints202402.0848.v1), 2024-02-15
Supplement: Supplementary file 5 [file Supplementary table.docx]

**Supplementary table**: Frequency of occurrence of phyla, genera, and species of microorganisms before and after treatment and their role in metabolism.

|  | **Before** | **After** | **Role in metabolism** | **Ref.** |
| --- | --- | --- | --- | --- |
|  | N(%) | N(%) |  |  |
| **Phylum Firmicutes** | | | | |
| *Blautia hydrogenotrophica* | 10 (22) | 36(80) | Involved in regulating the coexistence of anaerobic respiratory pathways. | 1 |
| *Blautia obeum* | 3(6) | 34(75) | It can inhibit the growth of *C. perfringens* and vancomycin-resistant enterococci, demonstrating its potential as a probiotic with beneficial probiotic effects. | 1 |
| *Butyrivibrio fibrisolvens* | 4(8) | 28(62) | Lack of information in the literature. | - |
| *Catenibacterium faecis* | 4(8) | 19(42) | Individuals at a heightened risk of cardiovascular disease exhibit decreased levels of *Catenibacterium* species in their microbiota. | 2 |
| *Clostridium celerecrescens* | 2(4) | 11(24) | Lack of information in the literature. | - |
| *Clostridium coccoides* | 2(4) | 12(26) | There is a positive association between the prevalence of *Clostridium coccoides* and a substantial consumption of monounsaturated fatty acids and polyunsaturated fatty acids. | 3 |
| *Enterocloster clostridioformis* | 1(2) | 14(31) | Lack of information in the literature. | - |
| *Clostridium fusiformis* | 1(2) | 15(33) | Lack of information in the literature. | - |
| *Clostridium indolis* | 0 | 16(35) | Lack of information in the literature. | - |
| *Clostridium perfringens* | 2(4) | 5(11) | *Clostridium perfringens* constitutes a significant factor behind histotoxic and intestinal infections in both humans and other animals. | 4 |
| *Clostridium phoceensis* | 2(4) | 11(24) | This Family in the gut microbiome is reduced in athletes' metabolism and increased in sedentary people. | 5 |
| *Coprococcus catus* | 2(4) | 23(51) | Contributes to the production of essential short-chain fatty acids, including butyrate and propionate, which collectively support the well-being of the digestive system and metabolic functions. | 6 |
| *Dorea longicatena* | 20(44) | 0 | Biomarkers of inflammation show a positive connection with *Dorea longicatena*, indicating its potential role in influencing inflammatory processes. | 7 |
| *Enterococcus faecalis* | 4(8) | 4(8) | This Family might cause infections and is resistant to oxidative stress. | 8 |
| *Eubacterium contortum* | 1(2) | 10(22) | *Eubacterium contortum* can produce p-cresol, an organic compound associated with health implications. | 9 |
| *Eubacterium coprostanoligenes* | 9(20) | 0 | Found in obese people's microbiome, might decrease cholesterol levels. | 10 |
| *Eubacterium eligens* | 2(4) | 17(37) | Promising potential of probiotic as a prospective therapeutic focus for addressing atherosclerosis. | 11 |
| *Dorea formicigenerans* | 1(2) | 24(53) | It has been found to exhibit an inverse correlation with insulin resistance. | 7 |
| *Eubacterium halii* | 1(2) | 23(51) | It is being assessed in preclinical and clinical trials as potential next-gen probiotic for advancing innovative dietary supplement formulations. | 12 |
| *Eubacterium ramulus* | 3(6) | 25(55) | Exhibits proficiency in breaking down diverse dietary flavonoids (which provides health benefits). | 13 |
| *Eubacterium ventriosum* | 2(4) | 22(48) | Demonstrates higher prevalence among individuals with elevated body mass index and serves as a producer of butyrate (molecule that contributes to a healthy gut). | 14 |
| *Faecalibacterium prausnitzii* | 13(28) | 44(97) | This anti-inflammatory family holds the position of being the most prevalent bacterium in the intestinal microbiota of healthy adults. | 15 |
| *Limosilactobacillus reuteri* | 0 | 36(80) | Describes multiple metabolic pathways that boost the creation of anti-inflammatory cytokines and regulate the gut microbiota through the generation of molecules with antimicrobial properties. | 16 |
| *Limosilactobacillus fermentum* | 31(68) | 30(66) | Positively influences the host's antioxidant and anti-inflammatory systems, leading to improved glucose regulation in diabetes. | 17 |
| *Lactobacillus acidophilus* | 27(60) | 32(71) | It can degrade oxalate (a substance that can cause problems) effectively, even when there are other types of carbon sources available that it prefers. | 18 |
| *Lactobacillus crispatus* | 5(11) | 32(71) | It shows promise as a probiotic option for managing dysbiosis, especially in women, with potential applications for both prevention and treatment. | 19 |
| *Lactobacillus gasseri* | 1(2) | 32(71) | It can degrade oxalate (substance that can cause problems) effectively, even when there are other types of carbon sources available that it prefers. | 18 |
| *Lactobacillus ingluviei* | 35(77) | 25(55) | It is related to weight increase. | 20 |
| *Lactobacillus johnsonii* | 0 | 30(66) | It has been extensively researched for its probiotic actions, which involve inhibiting pathogens, attaching to epithelial cells, and modulating the immune system. | 21 |
| *Lactobacillus rogosae* | 1(2) | 35(77) | It has anti-inflammatory properties and improves insulin sensitivity. | 22 |
| *Lactobacillus ruminis* | 5(11) | 29(64) | Probiotic resides as a commensal species in the digestive tract and offers potential for application in the functional food field. | 23 |
| *Lactobacillus sakei* | 4(8) | 32(71) | Exhibits probiotic potential based on in vitro assessment and has the ability to potentially lower inflammation by regulating intestinal metabolism. | 24 |
| *Lachnospira pectinoschiza* | 28(62) | 17(37) | It's recognized as a type of *Lachnospiraceae* bacteria in the human gut that can make use of pectin, a dietary fiber. | 6 |
| *Lachnospira multipara* | 1(2) | 28(62) | It is a 2 butyrate producer, a short-chain fatty acid which improves the gut health. | 25 |
| *Lachnospira straminea* | 1(2) | 24(53) | Lack of information in the literature. | - |
| *Bacillus nealsonii* | 1(2) | 27(60) | Lack of information in the literature. | - |
| *Odoribacter splanchnicus* | 0 | 29(64) | Produces short-chain fatty acids. Reduced levels of *Odoribacter* have been linked to microbiota-related diseases, including non-alcoholic fatty liver disease, cystic fibrosis, and inflammatory bowel disease (IBD). | 26 |
| *Oribacterium sinus* | 39(86) | 15(33) | Lack of information in the literature. | - |
| *Oscillibacter valericigenes* | 2(4) | 32(71) | Is a valerate producer, a type of short-chain fatty acid, generally considered beneficial for gut health. | 27 |
| *Phascolarctobacterium faecium* | 2(4) | 31(68) | It has the capability to generate beneficial short-chain fatty acids like acetate and propionate, which can promote the well-being of the gut. | 28 |
| *Pediococcus pentosaceus* | 1(2) | 31(68) | Certain varieties have been documented to alleviate inflammation, encephalopathy, obesity, and fatty liver in animal studies. | 29 |
| *Roseburia hominis* | 3(6) | 38(84) | Enhances the host's intestinal microbial balance and positively impacts the absorption of nutrients. | 30 |
| *Roseburia intestinalis* | 7(15) | 38(84) | Demonstrates higher prevalence among individuals with elevated body mass index and serves as a producer of butyrate (molecule that contributes to a healthy gut). | 14 |
| *Roseburia inulinivorans* | 3(6) | 32(71) | Contributes to the synthesis of butyrate. | 31 |
| *Roseburia faecis* | 3(6) | 32(71) | Generates short-chain fatty acids, with a particular emphasis on butyrate. | 32 |
| *Roseburia cecicola* | 1(2) | 34(75) | Also generates short-chain fatty acids, with a particular emphasis on butyrate. | 32 |
| *Ruminococcus gnavus* | 34(75) | 7(15) | Among adults, *R. gnavus* exhibited the most pronounced responsiveness to disturbances in circadian rhythms. | 33 |
| *Ruminococcus bromii* | 3(6) | 33(73) | A crucial species responsible for breaking down resistant starch (a substantial energy source) in the human colon. | 34 |
| *Ruminococcus torques* | 4(8) | 22(48) | Generates an essential enzyme that plays a vital role in the effective production of ursodeoxycholic acid (UDCA), a potent medication used to treat primary biliary cirrhosis and human cholesterol gallstones. | 35 |
| **Phylum Bacteroidetes** | | | | |
| *Alistipes finegoldii* | 17(37) | 35(77) | Examination showed a direct link between the prevalence of this group and the acetylation of glycoproteins in overweight women. These glycoproteins have significant roles in biological functions. | 36 |
| *Alistipes indistinctus* | 3(6) | 23(51) | It exhibits a direct relationship with mast cells and substances that stimulate the immune system. | 37 |
| *Alistipes inops* | 7(15) | 24(53) | Lack of information in the literature. | - |
| *Alistipes putredinis* | 1(2) | 32(71) | It is a probiotic microorganism that provides advantages to the host organism. | 38 |
| *Alistipes senegalensis* | 39(6) | 12(26) | Is a common family related to people without obesity. | 39 |
| *Alistipes obesi* | 31(68) | 37(82) | In lean individuals, it was notably more abundant, and its numbers increased as they pursued their dieting regimen. | 40 |
| *Alistipes shahii* | 6(13) | 17(37) | Is also a common family related to people without obesity. | 39 |
| *Bacteroides caccae* | 4(8) | 16(35) | Lack of information in the literature. | - |
| *Bacteroides dorei* | 39(86) | 29(64) | Might decrease the production of lipopolysaccharides by gut microbes and prevent the development of atherosclerosis. | 41 |
| *Bacteroides eggerthii* | 3(6) | 10(22) | Lack of information in the literature. | - |
| *Bacteroides fragilis* | 4(8) | 10(22) | It serves a significant nutritional function compared to other microorganisms and encourages immune cells to exhibit anti-inflammatory responses. | 42 |
| *Bacteroides massiliensis* | 2(4) | 11(24) | It has been correlated with distinct probabilities of prostate cancer onset or the degree of prostate cancer progression. | 43 |
| *Bacteroides ovatus* | 3(6) | 12(26) | The existence of this bacterium appears to elevate immune cell levels, potentially associating it with an increased risk of Type 2 diabetes in obese individuals. | 44 |
| *Bacteroides stercoris* | 1(2) | 9(20) | Is noticeably more abundant in stool samples from individuals with Diabetic Neuropathy. | 45 |
| *Bacteroides thetaiotaomicron* | 3(6) | 13(28) | It influences the expression of numerous genes involved in various aspects of the host's physiology, aiding the organism in crucial functions. | 46 |
| *Bacteroides uniformis* | 6(13) | 14(31) | Lack of information in the literature. | - |
| *Bacteroides vulgatus* | 5(11) | 14(31) | Has the ability to produce GABA. | 47 |
| *Bacteroides xylanisolvens* | 0 | 17(37) | Has the ability to degrade Xylan, a polysaccharide that can serve as a prebiotic. | 48 |
| *Parabacteroides distasonis* | 4(8) | 7(15) | Aerotolerant anaerobic microbe, exhibiting increasing resistance to antimicrobials, and playing dual roles in human health as both a pathogen and a probiotic. | 49 |
| *Parabacteroides merdae* | 1(2) | 9(20) | This group is increased in individuals with hypertension. | 50 |
| *Prevotella bivia* | 5(11) | 15(33) | Lack of information in the literature. | - |
| *Prevotella buccalis* | 3(6) | 21(46) | The changes in the level of IL-1β and TNF-α (immune-related molecules) is associated with this family. | 51 |
| *Prevotella copri* | 15(33) | 32(71) | It plays a crucial role in the digestive system of many people, making it one of the key components. | 52 |
| *Prevotella oris* | 2(4) | 15(33) | A strong positive link exists between the occurrence of *P. oris* in the oral microbiota and both a person's age and their level of insulin resistance. | 53 |
| *Prevotella stercorea* | 4(8) | 13(28) | These bacteria may collaborate with *P. copri* to aid in the digestion of dietary fiber present in our food. | 54 |
| *Barnesiella intestinihominis* | 2(4) | 19(42) | Is responsible in the gut for amino acid, carbohydrate and fatty acid degradation. | 55 |
| **Phylum Actinobacteria** | | | | |
| *Atopobiom vaginae* | 14(31) | 8(17) | It has been demonstrated to have a significant impact on the development and progression of bacterial vaginosis. | 56 |
| *Bifidobacterium adolescentis* | 18(40) | 27(60) | It is a crucial component of the human gut microbial community, influencing the production of GABA and regulating the communication between the gut and the brain through the gut-brain axis. | 57 |
| *Bifidobacterium bifidum* | 21(46) | 32(71) | It is more common in infants and is associated with lower occurrence of diarrhea caused by the use of antibiotics. | 58 |
| *Bifidobacterium catenulatum* | 7(15) | 22(48) | It is a commensal gut bacteria in healthy adults. | 59 |
| *Bifidobacterium pseudocatenulatum* | 12(26) | 22(48) | Has also the ability to degrade Xylan, a polysaccharide that can serve as a prebiotic. | 60 |
| *Bifidobacterium angulatum* | 10(22) | 21(46) | This bacterial group's β-galactosidase enzymes break down lactose and foster the growth of beneficial gut bacteria, boosting overall gut health. | 61 |
| *Bifidobacterium animalis* | 5(11) | 14(31) | Using it as a probiotic supplement is highly promising for supporting obesity treatment. | 62 |
| *Bifidobacterium dentium* | 6(13) | 18(40) | It has the capacity to process diverse nutrient sources, including many of plant origin, indicating that *B. dentium* can utilize dietary compounds. | 63 |
| *Bifidobacterium breve* | 3(6) | 17(37) | Is connected to the maintenance of a stable gut microbiome in individuals who are in a healthy condition. | 64 |
| *Collinsella aerofaciens* | 0 | 10(22) | This bacterium's presence is linked to higher secondary bile acid levels, indicating a possible involvement in their production or metabolism in the gut | 65 |
| **Phylum Proteobacteria** | | | | |
| *Staphylococcus aureus* | 21(46) | 5(11) | Is a primary reason for biofilm infections on medical equipment, such as prosthetic joints, which impose a substantial healthcare challenge. | 66 |
| *Klebsiella pneumoniae* | 13(28) | 4(8) | It has the potential to act as a pathogen and a driving factor in the onset of hypertension. | 67 |
| *Acinetobacter baumannii* | 14(31) | 7(15) | Contributes significantly to the mortality of patients in the intensive care unit (ICU) by causing a variety of infections in this vulnerable ICU population. | 68 |
| *Escherichia coli* | 45(100) | 44(97) | They are frequently found in the human microbiota, and these isolates can play probiotic, commensal, or pathogenic roles within the host. | 69 |
| *Proteus mirabilis* | 9(20) | 3(6) | It's recognized for its ability to produce urease and the potential infections it can lead to. | 70 |
| *Desulfovibrio piger* | 9(20) | 1(2) | The most frequently encountered sulfate-reducing bacteria in the gut within a surveyed group of healthy adults from the United States. | 71 |
| *Bilophila wadsworthia* | 5(11) | 1(2) | Is able to convert taurine, a common gut substance, into the harmful compound hydrogen sulfide (H2S) by its metabolism. This conversion is linked to inflammatory bowel disease and colorectal cancer. | 72 |
| *Parasutterella excrementihominis* | 8(17) | 1(2) | The study found that higher levels of *Parasutterella* bacteria in the gut were associated with the activation of a pathway involved in making fatty acids, potentially leading to weight gain. This connection was reinforced when *Parasutterella excrementihominis* levels decreased in participants who followed a low-carb diet as part of a weight loss program. | 73 |
| *Citrobacter freundii* | 7(15) | 2(4) | *C. freundii,* as an opportunistic pathogen, can lead to a wide range of infections, including those affecting the urinary tract, respiratory tract, wounds, and bloodstream. | 74 |
| **Phylum Verrucomicrobia** | | | | |
| *Akkermansia muciniphila* | 11(24) | 45(100) | It is being assessed in preclinical and clinical trials as a potential next-gen probiotic for advancing innovative dietary supplement formulations. | 12 |
| **Phylum Euryarchaeota** | | | | |
| *Methanobrevibacter smithii* | 27(60) | 23(51) | Is considered a biomarker that can indicate a healthy colon. | 75 |
| **Phylum Tenericutes** | | | | |
| *Mycoplasma hominis* | 10(22) | 37(82) | One of the mycoplasma species that is widely acknowledged for its role in causing the most clinically relevant infections. | 76 |
| **Phylum Fusobacteria** | | | | |
| *Fusobacterium nucleatum* | 0 | 28(62) | It has been traditionally associated with opportunistic infections. Nevertheless, it is a frequent component of the oral microbiome and can establish a mutually beneficial relationship with its host. | 77 |
| *Fusobacterium varium* | 10(22) | 1(2) | *F. varium* has been associated with both advantageous and detrimental interactions between bacteria and their host. | 78 |

**References:**

1. LIU, Xuemei et al. Blautia—a new functional genus with potential probiotic properties?. **Gut microbes**, v. 13, n. 1, p. 1875796, 2021.
2. HOU, Qiangchuan et al. Koumiss consumption modulates gut microbiota, increases plasma high density cholesterol, decreases immunoglobulin G and albumin. **Journal of Functional Foods**, v. 52, p. 469-478, 2019.
3. JAMAR, Giovana et al. Relationship between fatty acids intake and Clostridium coccoides in obese individuals with metabolic syndrome. **Food Research International**, v. 113, p. 86-92, 2018.
4. LI, Jihong; UZAL, Francisco A.; MCCLANE, Bruce A. Clostridium perfringens sialidases: potential contributors to intestinal pathogenesis and therapeutic targets. **Toxins**, v. 8, n. 11, p. 341, 2016.
5. TABONE, Mariangela et al. The effect of acute moderate-intensity exercise on the serum and fecal metabolomes and the gut microbiota of cross-country endurance athletes. **Scientific Reports**, v. 11, n. 1, p. 3558, 2021.
6. VACCA, Mirco et al. The controversial role of human gut lachnospiraceae. **Microorganisms**, v. 8, n. 4, p. 573, 2020.
7. MORTAŞ, Hande; BILICI, Saniye; KARAKAN, Tarkan. The circadian disruption of night work alters gut microbiota consistent with elevated risk for future metabolic and gastrointestinal pathology. **Chronobiology International**, v. 37, n. 7, p. 1067-1081, 2020.
8. KEOGH, Damien et al. Extracellular electron transfer powers Enterococcus faecalis biofilm metabolism. **MBio**, v. 9, n. 2, p. e00626-17, 2018.
9. DU, Hai et al. Exploring the microbial origins of p-cresol and its co-occurrence pattern in the Chinese liquor-making process. **International journal of food microbiology**, v. 260, p. 27-35, 2017.
10. GÉRARD, Philippe. Metabolism of cholesterol and bile acids by the gut microbiota. **Pathogens**, v. 3, n. 1, p. 14-24, 2013.
11. LIU, Sheng et al. Metagenomic analysis of the gut microbiome in atherosclerosis patients identify cross‐cohort microbial signatures and potential therapeutic target. **The FASEB Journal**, v. 34, n. 11, p. 14166-14181, 2020.
12. ROMANÍ-PÉREZ, Marina; AGUSTI, Ana; SANZ, Yolanda. Innovation in microbiome-based strategies for promoting metabolic health. **Current Opinion in Clinical Nutrition and Metabolic Care**, v. 20, n. 6, p. 484-491, 2017.
13. BRAUNE, Annett; GÜTSCHOW, Michael; BLAUT, Michael. An NADH-dependent reductase from *Eubacterium ramulus* catalyzes the stereospecific heteroring cleavage of flavanones and flavanonols. **Applied and Environmental Microbiology**, v. 85, n. 19, p. e01233-19, 2019.
14. TIMS, Sebastian et al. Microbiota conservation and BMI signatures in adult monozygotic twins. **The ISME journal**, v. 7, n. 4, p. 707-717, 2013.
15. MIQUEL, Sylvie et al. *Faecalibacterium prausnitzii* and human intestinal health. **Current opinion in microbiology**, v. 16, n. 3, p. 255-261, 2013.
16. ABUQWIDER, Jumana; ALTAMIMI, Mohammad; MAURIELLO, Gianluigi. Limosilactobacillus reuteri in Health and Disease. **Microorganisms**, v. 10, n. 3, p. 522, 2022.
17. LACERDA, Diego Cabral et al. Potential role of *Limosilactobacillus fermentum* as a probiotic with anti-diabetic properties: A review. **World Journal of Diabetes**, v. 13, n. 9, p. 717, 2022.
18. CHAMBERLAIN, Casey A.; HATCH, Marguerite; GARRETT, Timothy J. Metabolomic profiling of oxalate-degrading probiotic *Lactobacillus acidophilus* and Lactobacillus gasseri. **PLos one**, v. 14, n. 9, p. e0222393, 2019.
19. PUEBLA-BARRAGAN, Scarlett et al. Interstrain variability of human vaginal Lactobacillus crispatus for metabolism of biogenic amines and antimicrobial activity against urogenital pathogens. **Molecules**, v. 26, n. 15, p. 4538, 2021.
20. DRISSI, Fatima et al. Comparative genomics analysis of Lactobacillus species associated with weight gain or weight protection. **Nutrition & diabetes**, v. 4, n. 2, p. e109-e109, 2014.
21. PRIDMORE, R. David et al. The genome sequence of the probiotic intestinal bacterium Lactobacillus johnsonii NCC 533. **Proceedings of the National Academy of Sciences**, v. 101, n. 8, p. 2512-2517, 2004.
22. BRERETON, N. J. B.; PITRE, F. E.; GONZALEZ, E. Reanalysis of the Mars500 experiment reveals common gut microbiome alterations in astronauts induced by long-duration confinement. **Computational and Structural Biotechnology Journal**, v. 19, p. 2223-2235, 2021.
23. O’DONNELL, Michelle M. et al. Lactobacillus ruminis strains cluster according to their mammalian gut source. **BMC microbiology**, v. 15, n. 1, p. 1-20, 2015.
24. ZOU, Xuan et al. Probiotic potential of Lactobacillus sakei L-7 in regulating gut microbiota and metabolism. **Microbiological Research**, v. 274, p. 127438, 2023.
25. SHI, Yong et al. Role of gut microbiota in postoperative complications and prognosis of gastrointestinal surgery: a narrative review. **Medicine**, v. 101, n. 29, 2022.
26. HIIPPALA, Kaisa et al. Novel *Odoribacter splanchnicus* strain and its outer membrane vesicles exert immunoregulatory effects in vitro. **Frontiers in microbiology**, v. 11, p. 575455, 2020.
27. PAJARILLO, Edward Alain B. et al. Characterization of the fecal microbial communities of Duroc pigs using 16S rRNA gene pyrosequencing. **Asian-Australasian journal of animal sciences**, v. 28, n. 4, p. 584, 2015.
28. WU, Feifan et al. *Phascolarctobacterium faecium* abundant colonization in human gastrointestinal tract. **Experimental and therapeutic medicine**, v. 14, n. 4, p. 3122-3126, 2017.
29. JIANG, Jie et al. Comparative genomics of *Pediococcus pentosaceus* isolated from different niches reveals genetic diversity in carbohydrate metabolism and immune system. **Frontiers in microbiology**, v. 11, p. 253, 2020.
30. CHENG, Hsin-Lin et al. The next generation beneficial actions of novel probiotics as potential therapeutic targets and prediction tool for metabolic diseases. **Journal of Food and Drug Analysis**, v. 30, n. 1, p. 1, 2022.
31. SCOTT, Karen P. et al. Substrate-driven gene expression in *Roseburia inulinivorans*: importance of inducible enzymes in the utilization of inulin and starch. **Proceedings of the National Academy of Sciences**, v. 108, n. supplement_1, p. 4672-4679, 2011.
32. TAMANAI-SHACOORI, Zohreh et al. *Roseburia* spp.: a marker of health?. **Future microbiology**, v. 12, n. 2, p. 157-170, 2017.
33. CROST, Emmanuelle H. et al. *Ruminococcus gnavus*: friend or foe for human health. **FEMS Microbiology Reviews**, v. 47, n. 2, p. fuad014, 2023.
34. ZE, Xiaolei et al. *Ruminococcus bromii* is a keystone species for the degradation of resistant starch in the human colon. **The ISME journal**, v. 6, n. 8, p. 1535-1543, 2012.
35. ZHENG, Ming-Min et al. Two-step enzymatic synthesis of ursodeoxycholic acid with a new 7β-hydroxysteroid dehydrogenase from Ruminococcus torques. **Process Biochemistry**, v. 50, n. 4, p. 598-604, 2015.
36. LOTANKAR, Mrunalini et al. Distinct Diet-Microbiota-Metabolism Interactions in Overweight and Obese Pregnant Women: a Metagenomics Approach. **Microbiology Spectrum**, v. 10, n. 2, p. e00893-21, 2022.
37. LIU, Jungang et al. Identification of colorectal cancer progression-associated intestinal microbiome and predictive signature construction. **Journal of Translational Medicine**, v. 21, n. 1, p. 1-19, 2023.
38. LIU, Lin et al. Clostridium butyricum potentially improves immunity and nutrition through alteration of the microbiota and metabolism of elderly people with malnutrition in long-term care. **Nutrients**, v. 14, n. 17, p. 3546, 2022.
39. MEIJNIKMAN, A. S. et al. Distinct differences in gut microbial composition and functional potential from lean to morbidly obese subjects. **Journal of Internal Medicine**, v. 288, n. 6, p. 699-710, 2020.
40. JIE, Zhuye et al. The baseline gut microbiota directs dieting-induced weight loss trajectories. **Gastroenterology**, v. 160, n. 6, p. 2029-2042. e16, 2021.
41. YOSHIDA, Naofumi et al. *Bacteroides v*ulgatus and *Bacteroides dorei* reduce gut microbial lipopolysaccharide production and inhibit atherosclerosis. **Circulation**, v. 138, n. 22, p. 2486-2498, 2018.
42. ZAKHARZHEVSKAYA, Natalya B. et al. Outer membrane vesicles secreted by pathogenic and nonpathogenic Bacteroides fragilis represent different metabolic activities. **Scientific reports**, v. 7, n. 1, p. 5008, 2017.
43. SHA, Sybil et al. The human gastrointestinal microbiota and prostate cancer development and treatment. **Investigative and clinical urology**, v. 61, n. Suppl 1, p. S43-S50, 2020.
44. LI, Yue et al. Bacteroides ovatus-mediated CD27− MAIT cell activation is associated with obesity-related T2D progression. **Cellular & Molecular Immunology**, v. 19, n. 7, p. 791-804, 2022.
45. ZHANG, Lili et al. Alterations of the gut microbiota in patients with diabetic nephropathy. **Microbiology Spectrum**, v. 10, n. 4, p. e00324-22, 2022.
46. ZOCCO, Maria Assunta et al. *Bacteroides thetaiotaomicron* in the gut: molecular aspects of their interaction. **Digestive and Liver Disease**, v. 39, n. 8, p. 707-712, 2007.
47. OTARU, Nize et al. GABA production by human intestinal Bacteroides spp.: Prevalence, regulation, and role in acid stress tolerance. **Frontiers in microbiology**, v. 12, p. 656895, 2021.
48. DESPRES, Jordane et al. Xylan degradation by the human gut Bacteroides xylanisolvens XB1AT involves two distinct gene clusters that are linked at the transcriptional level. **BMC genomics**, v. 17, n. 1, p. 1-14, 2016.
49. EZEJI, Jessica C. et al. Parabacteroides distasonis: intriguing aerotolerant gut anaerobe with emerging antimicrobial resistance and pathogenic and probiotic roles in human health. **Gut Microbes**, v. 13, n. 1, p. 1922241, 2021.
50. CUI, Yanlong et al. Roles of intestinal Parabacteroides in human health and diseases. **FEMS microbiology letters**, v. 369, n. 1, p. fnac072, 2022.
51. WANG, Qinghua et al. Multiomics analysis reveals aberrant metabolism and immunity linked gut microbiota with insomnia. **Microbiology Spectrum**, v. 10, n. 5, p. e00998-22, 2022.
52. FRANKE, Thomas; DEPPENMEIER, Uwe. Physiology and central carbon metabolism of the gut bacterium Prevotella copri. **Molecular microbiology**, v. 109, n. 4, p. 528-540, 2018.
53. PRINCE, Yvonne et al. The Relationship between the Oral Microbiota and Metabolic Syndrome. **Biomedicines**, v. 11, n. 1, p. 3, 2022.
54. YEOH, Yun Kit et al. Prevotella species in the human gut is primarily comprised of Prevotella copri, Prevotella stercorea and related lineages. **Scientific Reports**, v. 12, n. 1, p. 9055, 2022.
55. MANCABELLI, Leonardo et al. Meta‐analysis of the human gut microbiome from urbanized and pre‐agricultural populations. **Environmental microbiology**, v. 19, n. 4, p. 1379-1390, 2017.
56. MENDLING, Werner et al. An update on the role of Atopobium vaginae in bacterial vaginosis: what to consider when choosing a treatment? A mini review. **Archives of gynecology and obstetrics**, v. 300, p. 1-6, 2019.
57. DURANTI, Sabrina et al. Bifidobacterium adolescentis as a key member of the human gut microbiota in the production of GABA. **Scientific reports**, v. 10, n. 1, p. 14112, 2020.
58. O'CALLAGHAN, Amy; VAN SINDEREN, Douwe. *Bifidobacteria* and their role as members of the human gut microbiota. **Frontiers in microbiology**, v. 7, p. 925, 2016.
59. FIRRMAN, Jenni et al. The effect of quercetin on genetic expression of the commensal gut microbes *Bifidobacterium catenulatum*, *Enterococcus caccae* and *Ruminococcus gauvreauii*. **Anaerobe**, v. 42, p. 130-141, 2016.
60. DREY, Elizabeth; KOK, Car Reen; HUTKINS, Robert. Role of Bifidobacterium pseudocatenulatum in Degradation and Consumption of Xylan-Derived Carbohydrates. **Applied and environmental microbiology**, v. 88, n. 20, p. e01299-22, 2022.
61. POKUSAEVA, Karina; FITZGERALD, Gerald F.; VAN SINDEREN, Douwe. Carbohydrate metabolism in Bifidobacteria. **Genes & nutrition**, v. 6, p. 285-306, 2011.
62. MARTORELL, Patricia et al. Probiotic strain Bifidobacterium animalis subsp. lactis CECT 8145 reduces fat content and modulates lipid metabolism and antioxidant response in Caenorhabditis elegans. **Journal of agricultural and food chemistry**, v. 64, n. 17, p. 3462-3472, 2016.
63. ENGEVIK, Melinda A. et al. The metabolic profile of Bifidobacterium dentium reflects its status as a human gut commensal. **BMC microbiology**, v. 21, n. 1, p. 154, 2021.
64. DERRIEN, Muriel et al. Insights into endogenous Bifidobacterium species in the human gut microbiota during adulthood. **Trends in Microbiology**, 2022.
65. BUSTAMANTE, Jessica-Miranda et al. Impact of fecal microbiota transplantation on gut bacterial bile acid metabolism in humans. **Nutrients**, v. 14, n. 24, p. 5200, 2022.
66. BERTRAND, Blake P. et al. Role of Staphylococcus aureus formate metabolism during prosthetic joint infection. **Infection and immunity**, v. 90, n. 11, p. e00428-22, 2022.
67. LI, Jing et al. Causality of opportunistic pathogen Klebsiella pneumoniae to hypertension development. **Hypertension**, v. 79, n. 12, p. 2743-2754, 2022.
68. MORTENSEN, Brittany L.; SKAAR, Eric P. The contribution of nutrient metal acquisition and metabolism to Acinetobacter baumannii survival within the host. **Frontiers in cellular and infection microbiology**, v. 3, p. 95, 2013.
69. GATSIOS, Alexandra; KIM, Chung Sub; CRAWFORD, Jason M. Escherichia coli small molecule metabolism at the host–microorganism interface. **Nature chemical biology**, v. 17, n. 10, p. 1016-1026, 2021.
70. ARMBRUSTER, Chelsie E.; MOBLEY, Harry LT; PEARSON, Melanie M. Pathogenesis of Proteus mirabilis infection. **EcoSal Plus**, v. 8, n. 1, p. 10.1128/ecosalplus. ESP-0009-2017, 2018.
71. REY, Federico E. et al. Metabolic niche of a prominent sulfate-reducing human gut bacterium. **Proceedings of the national academy of sciences**, v. 110, n. 33, p. 13582-13587, 2013.
72. PECK, Spencer C. et al. A glycyl radical enzyme enables hydrogen sulfide production by the human intestinal bacterium Bilophila wadsworthia. **Proceedings of the National Academy of Sciences**, v. 116, n. 8, p. 3171-3176, 2019.
73. HENNEKE, Lea. **Characterization of specific Gut Bacteria and bacterial Metabolites in Human Obesity and Type 2 Diabetes**. 2022. Tese de Doutorado.
74. ANDERSON, Mark T. et al. Citrobacter freundii fitness during bloodstream infection. **Scientific reports**, v. 8, n. 1, p. 11792, 2018.
75. GHAVAMI, Shaghayegh Baradaran et al. Alterations of the human gut Methanobrevibacter smithii as a biomarker for inflammatory bowel diseases. **Microbial pathogenesis**, v. 117, p. 285-289, 2018.
76. POKU, Vivian Osei. Maternal mortality: the role of mycoplasma hominis and its impact on neonatal health. **Health Sciences Review**, p. 100036, 2022.
77. BRENNAN, Caitlin A.; GARRETT, Wendy S. Fusobacterium nucleatum—symbiont, opportunist and oncobacterium. **Nature Reviews Microbiology**, v. 17, n. 3, p. 156-166, 2019.
78. POTRYKUS, Joanna et al. Proteomic investigation of glucose metabolism in the butyrate‐producing gut anaerobe Fusobacterium varium. **Proteomics**, v. 7, n. 11, p. 1839-1853, 2007.
